# Supplementary material
Source: PubMed Central journal article supplement (PMC7905512)
Supplement: SEL896794_Supplemental_Material1.pdf [file SEL896794_Supplemental_Material1.pdf]

## Appendix 1.

### Search Medline

1. (Arthroplasty, replacement, shoulder[MeSH Terms] AND shoulder arthroplasty[MeSH Major Topic]
2. (shoulder\* AND replac\*)
3. "shoulder arthroplast\*"
4. #1 OR #2 OR #3
5. tranexamic acid[MeSH Terms]
6. tranexam\*
7. #5 OR #6
8. #4 AND #7

### Search Embase

1. ('shoulder'/exp OR shoulder) AND ('arthroplasty'/exp OR arthroplasty)
2. shoulder AND replacement
3. #2 OR #3
4. 'tranexamic acid'
5. #4 AND #5

### Search CENTRAL

1. MeSH descriptor: [Arthroplasty, Replacement, Shoulder] explode all trees
2. (shoulder\* and replac\*)
3. "shoulder arthroplast\*"
4. MeSH descriptor: [Shoulder Prosthesis] explode all trees
5. #1 or #2 or #3 or #4
6. MeSH descriptor: [Tranexamic Acid] explode all trees
7. "tranexamic ac\*"
8. #6 or #7
9. #5 and #8
